# Supplementary material for: Hollow CeO2dodecahedrons: one-step template synthesis and enhanced catalytic performance
Source: Royal Society of Chemistry journal article supplement (doi:10.1039/c6ra11268d), 2016-01-01
Supplement: c6ra11268d1.pdf [file c6ra11268d1.pdf]

## Supporting Information

### Hollow CeO<sub>2</sub> Dodecahedrons: One-Step Template Synthesis and Enhanced Catalytic Performance

*Zhengping Li, Fangchun Han, Cheng Li,\* Xiuling Jiao,\* and Dairong Chen*

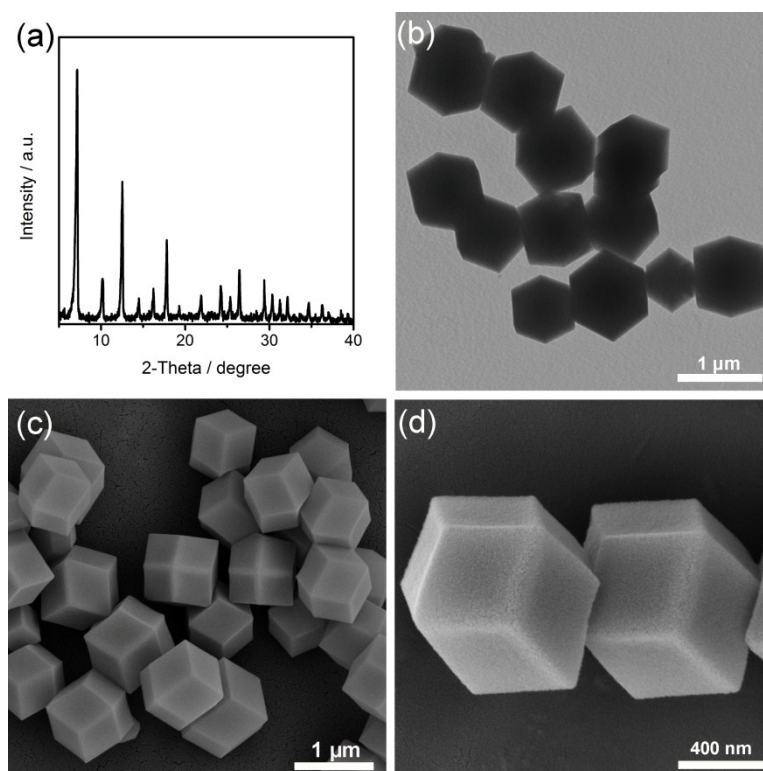

**Figure S1.** XRD pattern (a), TEM image (b), and low- (c) and high-magnification SEM images (d) of ZIF-67 nanocrystals.

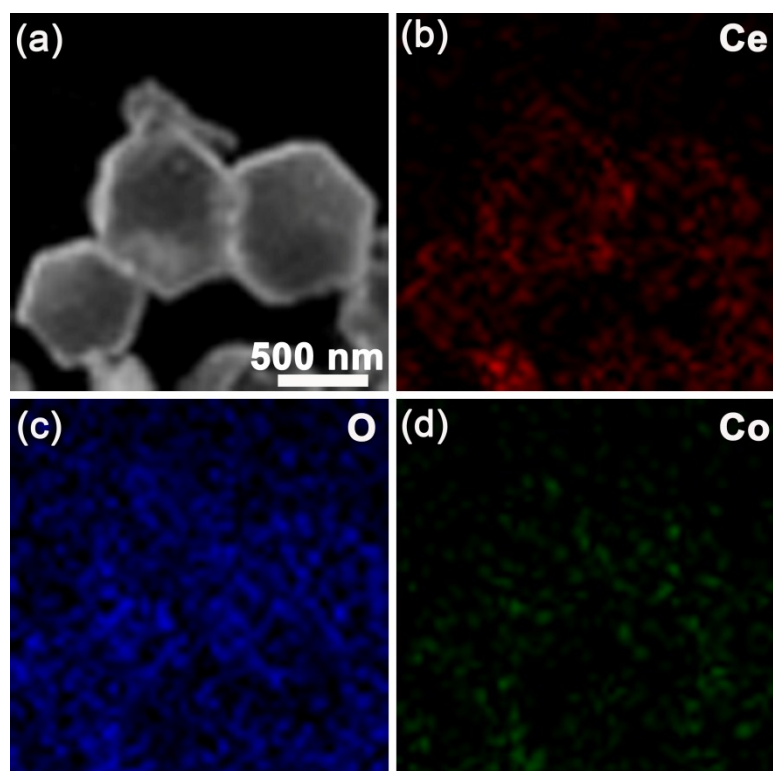

**Figure S2.** SEM image (a) and the corresponding EDS mapping of Ce (b), O (c), and Co (d) of the as-obtained hollow  $\text{CeO}_2$  dodecahedrons.

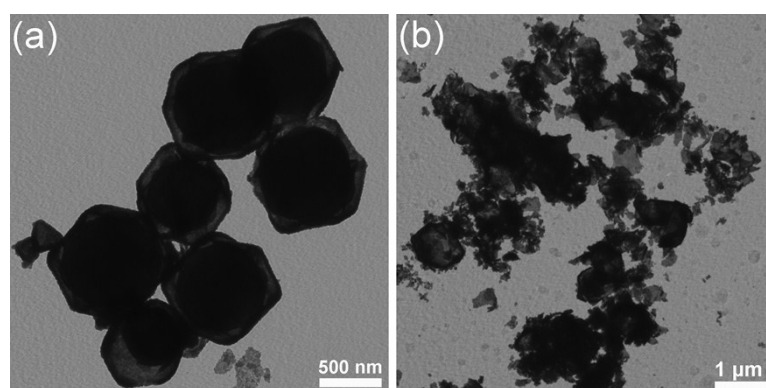

**Figure S3.** TEM images of ZIF-67@ $\text{CeO}_2$  yolk-shell structures (a) and cracked plates (b) formed using 0.03 g and 0.6 g of  $\text{Ce}(\text{NO}_3)_3 \cdot 6\text{H}_2\text{O}$ , respectively.

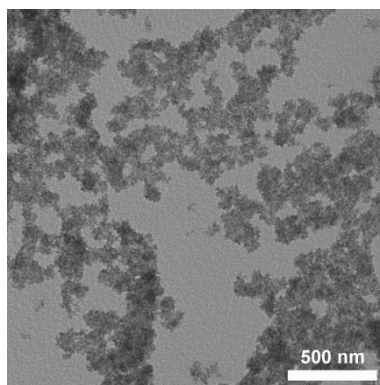

**Figure S4.** TEM image of the product using water as the solvent.

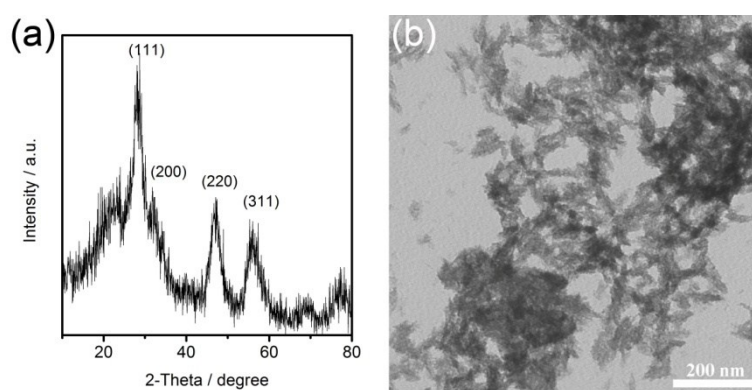

**Figure S5.** XRD pattern (a) and TEM image (b) of spindle-like nanostructures of  $\text{CeO}_2$  formed using  $\text{CeCl}_3 \cdot 7\text{H}_2\text{O}$  as the cerium source.

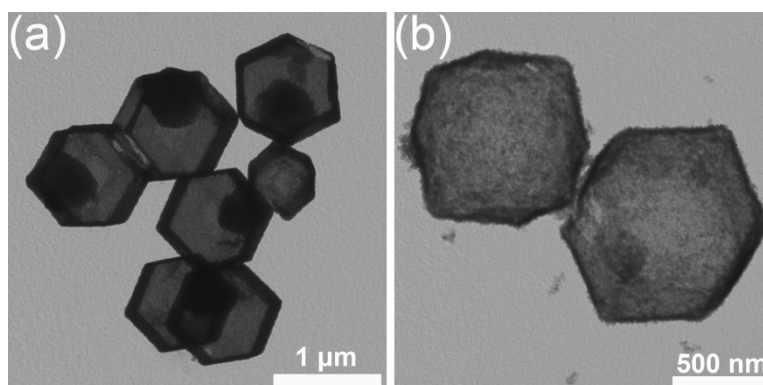

**Figure S6.** TEM images of the yolk-shell structures (a) and hollow structures after acid etching (b).

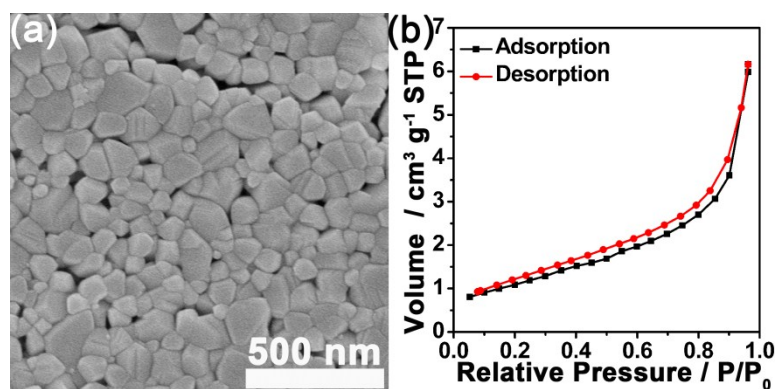

**Figure S7.** SEM image (a) and N<sub>2</sub> adsorption-desorption isotherm (b) of the commercial CeO<sub>2</sub> powder.

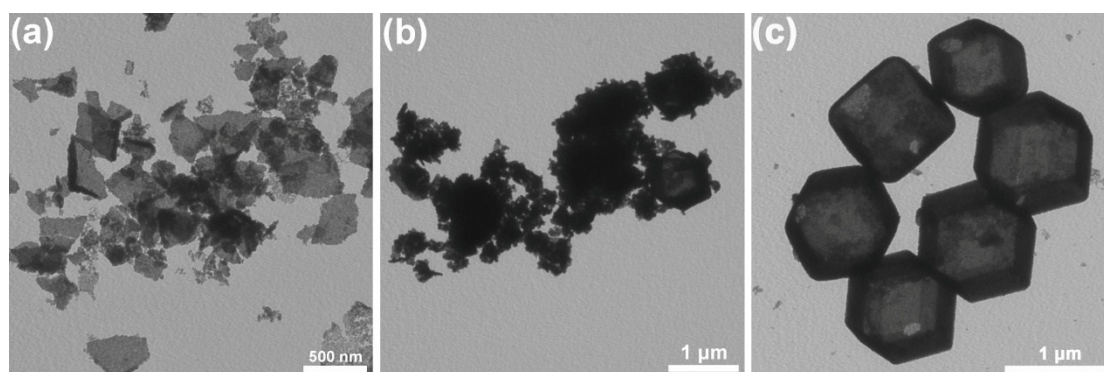

**Figure S8.** TEM images of crushed (a), annealed (b) and acid washed (c) hollow CeO<sub>2</sub> dodecahedrons.

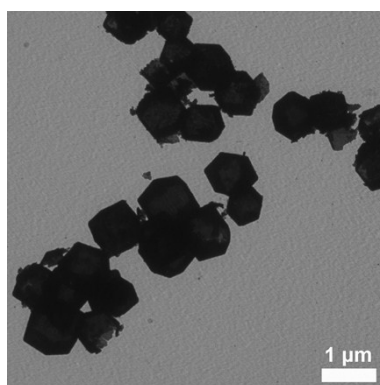

**Figure S9.** TEM images of hollow CeO<sub>2</sub> dodecahedrons after the catalysis of CO oxidation.
